# Elastic energy savings and active energy cost in a simple model of running

Ryan T. Schroeder<sup>1</sup> and Arthur D. Kuo<sup>1,2</sup>

<sup>1</sup>Faculty of Kinesiology, University of Calgary, Alberta, Canada

<sup>2</sup>Biomedical Engineering Program, University of Calgary, Alberta, Canada

## Abstract

The energetic economy of running benefits from tendon and other tissues that store and return elastic energy, thus saving muscles from costly mechanical work. The classic “Spring-mass” computational model successfully explains the forces, displacements and mechanical power of running, as the outcome of dynamical interactions between the body center of mass and a purely elastic spring for the leg. Conversely, the Spring-mass model does not include active muscles and cannot explain the metabolic energy cost of running. Here we add explicit actuation and dissipation to the Spring-mass model, resulting in substantial active (and thus costly) work for running on level ground and up or down slopes. Dissipation is modeled as modest energy losses (5% of total mechanical energy for running at  $3 \text{ m} \cdot \text{s}^{-1}$ ) from hysteresis and foot-ground collisions, that must be restored by active work each step. Even with substantial elastic energy return (59% of positive work, comparable to empirical observations), the active work could account for most of the metabolic cost of human running (about 68%, assuming human-like muscle efficiency). We also introduce a previously unappreciated energetic cost for rapid production of force, that helps explain the relatively smooth ground reaction forces of running, and why muscles might also actively perform negative work. Although elastic return is key to energy savings, there are still losses that require restorative muscle work, which can cost substantial energy during running.

## Author Summary

Running is an energetically economical gait whereby the legs bounce like pogo sticks. Leg tendons act elastically to store and return energy to the body, thus saving the muscles from costly work with each running step. Although elasticity is known to save energy, it does not explain why running still requires considerable effort, and why the muscles still do any work at all. We use a simple computational model to demonstrate two possible reasons why. One is that small amounts of energy are lost when the leg collides with the ground and when the tendons are stretched, and muscles must restore that energy during steady running. A second reason is that muscles may perform work to avoid turning on and off rapidly, which may be even more energetically costly. The resulting muscle work, while small, may actually explain most of the energetic cost of running. Economy may be gained from elasticity, but running nonetheless requires muscles to do active work.

## Introduction

Running is distinguished by the spring-like, energy-saving behavior of the stance limb (1–4), analogous to a pogo stick (Fig. 1). It is modeled well by a classic analogy, the *Spring-mass model*, where the limb acts elastically to support and redirect the body center of mass (CoM) between flight phases. This simple model can reproduce the motion and forces of running remarkably well, and explains how series elastic tissues such as tendon can improve running economy. It applies to bipeds and even polypeds, making it one of the most universal and elegant models for running. However, it does not include muscles that actively contract against series elasticity, and it fails to explain the substantial metabolic cost measured during running. An extension of the Spring-mass model to include active actuation may help explain organismal running energetics and how best to exploit series elasticity for economy.

The Spring-mass model agrees well with a wide body of experimental evidence (4). It reproduces mechanical characteristics such as the body's trajectory in space (Fig. 1a), ground reaction forces (Fig. 1b), leg mechanical power (Fig. 1c), and even the leg's vertical work loop curve (vertical acceleration vs. vertical displacement similar to an elastic spring's work loop, Fig. 1e; (4)). The spring can passively store and return mechanical energy to the CoM, reducing the active work otherwise required of active muscle, and thus, improve running economy. Some have therefore proposed that more compliance or longer tendons are key to running economy (5,6). For example, the energetic cost of human running is less than half of that expected if muscles alone performed work on the CoM (7). In turkeys, tendon contributes over 60% of the shortening work performed by the lateral gastrocnemius (8). Although the simple Spring-mass model (Fig. 2a) applies mainly to bipedal running or polypedal trotting, multiple leg springs can reproduce galloping, and indeed, practically all of the running gaits observed in nature (9,10). Few other models reproduce so many behaviors with such simplicity.

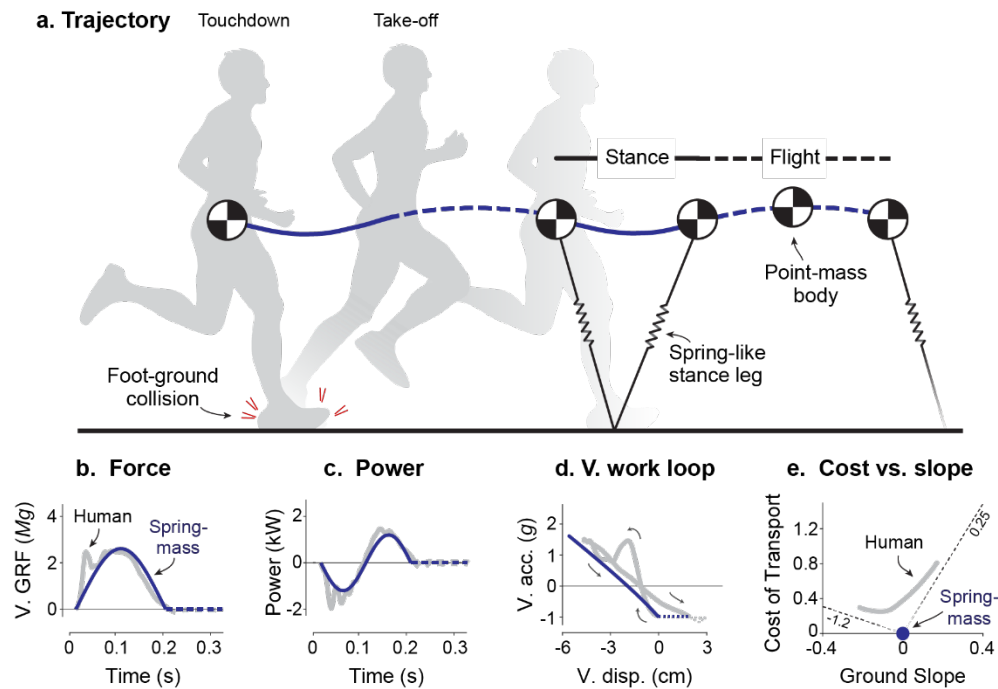

**Fig 1. Running and the Spring-mass model.**

a) Stance phases resemble motion of a spring-mass system, alternating with parabolic Flight phases.

Body mass is lumped into a single point center of mass (CoM). Traces of (b) vertical ground reaction

forces (V. GRF) vs. Time, (c) leg power vs. Time, (d) and vertical acceleration vs. displacement (V. acc. vs.

V. disp.; termed *vertical work loop curve*), (d) are all shown for both human data (gray lines) and the

Spring-mass model (dark solid lines). (e) The energetic Cost of Transport (cost per unit weight and

distance) for running on slopes (after (11)) is not explained by the Spring-mass model, which only

operates at zero ground slope and zero energetic cost. The spring-like behaviors (b – d) should be

regarded as pseudo-elastic, because humans and other animals experience dissipation such as in foot-

ground collision, and thus, require active muscle actuation.

There are also important aspects of running not captured by the Spring-mass model. A critical feature is

metabolic energy expenditure by muscle (12), considered important for selecting gait and speed (13,14),

and more generally for a variety of animal behaviors (15). The Spring-mass model is conservative of mechanical energy and predicts no such expenditure. Lacking muscle actuation, it is incapable of accelerating from rest or running on sloped ground. Steeper slopes in particular have energetic costs approaching that expected from muscles performing positive and negative work against gravity at their respective efficiencies (Fig. 1e; (11)). Even steady running on the level entails substantial muscle shortening work, as shown in turkeys (e.g., 40% of muscle-tendon work; (8)), and in human running (16,17). Some of that work is fundamentally necessary because of dissipation, for example by tendons with hysteresis (26% loss per cycle in Achilles tendon during hopping; (18)), by the heel pad (19) and other soft tissues that deform (33% per step of human running at  $3 \text{ m} \cdot \text{s}^{-1}$ , (20)). Restoration of those losses alone could account for up to 29% of the energetic cost of human running (20), and the overall active work of muscle for as much as 76% of the energetic cost of human running (21). The spring-like mechanics of running (Fig. 1b-d) should therefore be regarded as pseudo-elastic, as opposed to purely elastic. Beyond the conceptual illustration of energy savings, the Spring-mass does not account for dissipation and is not predictive of actual energy costs observed in nature.

Other simple models of running have included elements other than springs. Perhaps the simplest of these has only an active, extending actuator (Actuator-only model, Fig. 2b; (14)). Minimization of its work alone is sufficient for both walking and running to emerge as optimal gaits, with running more economical at faster speeds and exhibiting a pseudo-elastic, bouncing-like stance phase despite no elasticity (14). In addition to mechanical work as a cost, we have proposed that muscles also expend energy for a *force-rate cost*, associated with rapid production of force (22–25), which helps to explain human-like ground reaction forces (26). Others have optimized the actuation of robots, including both elasticity and dissipative elements, and have shown a variety of running gaits to emerge (27,28). But for organisms, even though dissipation has been characterized during ground impact (29), most running

energetics models have not included such dissipation alongside both series elasticity and actuation within periodic gait.

Here we propose a running model that combines series elasticity with active actuation and passive dissipation (Fig. 2). The classic Spring-mass (Fig. 2a) and pure Actuator-only (Fig. 2b) models serve as opposing reference points that can produce running mechanics (Fig. 1a-d) with and without elasticity. We propose to combine the spring and actuator in series, along with dissipation, in an *Actuated Spring-mass model* (Fig. 2c) that may be more representative of running in organisms. We expect that such a model will leverage series elasticity to perform minimal work, as needed to restore dissipative losses. We test whether such a model is sufficient to explain both the mechanics and metabolic cost of running (Fig. 1e), with work minimization as the sole objective, or work plus the proposed force-rate cost. Such a model may help determine whether more compliant tendon is indeed economical (6), and provide insight on the energy expended by muscle. Although human data serve as experimental comparison here, the principles revealed by the model are intended to help explain running across a range of animal species.

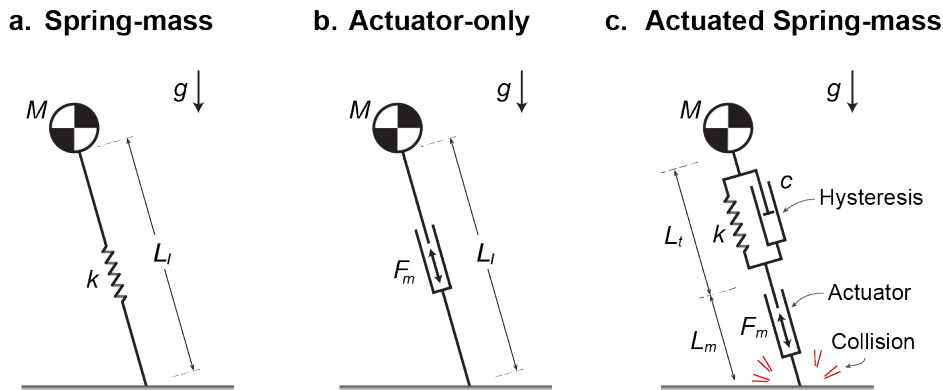

**Fig 2. Simple running models with and without elastic spring, active actuator, and dissipative elements.**

(a) The Spring-mass model comprises a point-mass body and a massless spring for a leg. (b) The Actuator-only model replaces the spring with a massless, active actuator producing extension forces in the leg (14). (c) The proposed Actuated Spring-mass model combines an actuator and a spring, along with two passive, dissipative elements: a damper in parallel with the spring to model tendon hysteresis, and collision loss to model dissipation of kinetic energy at touchdown. In the models,  $g$  is gravitational acceleration and  $M$  is body mass.  $L(t)$ ,  $L_t(t)$ , and  $L_m(t)$  are time-varying lengths of the leg, spring and actuator, respectively. Parameters  $k$  and  $c$  are spring stiffness and damping coefficient.  $F_m(t)$  is the active actuator force in the leg's extension direction.

## Methods

We used dynamic optimization to determine optimal actuation strategies for the proposed Actuator-Spring-mass running model. The model extends the classic Spring-mass model by adding an active actuator and dissipative losses (Fig. 2c). The actuator can perform positive or negative work actively, in part to compensate for two modes of passive energy dissipation: collision loss associated with foot-

ground contact and hysteresis of the tendon spring. The model was optimized for energy economy, as defined by the costs of active actuator work, briefly summarized here.

The most basic elements of the model are the mass and elastic spring. The point mass  $M$  was supported by a spring with stiffness  $k$ , which was varied as a free parameter to produce a wide spectrum of gaits. These included low stiffnesses ranging from grounded running with no flight phase, to more impulsive running with a brief stance period and a relatively long flight phase. The limiting case of impulsive running has infinitesimal stance and an infinitely stiff spring, where the body's motion is almost entirely described by its parabolic trajectory during flight.

Two types of dissipation were included in the model, representing losses from collisions and hysteresis. Collisions model the kinetic energy dissipated when the body impacts the ground. For example, humans lose momentum associated with 2.6-7.8% body mass (29). We modeled this as a simple discontinuity in the CoM velocity vector magnitude at touchdown, defining *collision fraction* (CF) as the fraction of momentum lost in the collision. A nominal collision fraction of 3% resulted in a 5.9% loss in kinetic energy (see S1 Appendix in Supporting Information for details).

Hysteresis was included to model the imperfect energy return of tendons and other series elastic tissues. Hysteretic energy losses of 10 – 35% per stretch-shortening cycle have been estimated *in vivo* for tissues such as the human Achilles tendon (30). Estimates of soft tissue deformation suggest that much of the actual dissipation occurs during the first half of stance (20), modeled with a viscous damper (in parallel with the spring) only dissipating energy during spring compression (Fig. 2c). Damping was a parameterized by damping ratio,  $\zeta = c/\sqrt{4Mk}$ , where  $c$  is the compressive damping coefficient. A nominal damping value of  $\zeta = 0.1$  was selected to yield 26% hysteresis, roughly within the estimated range of humans.



Each stance phase was computed with dynamic optimization for energy economy. The main control variable was the time-varying actuator length  $L(t)$  during one leg's stance phase, treating the stance and swing phases as periodic and symmetric between legs. The objective function to be minimized was the energy cost per step  $E$ ,

$$E = E_W + E_R, \quad (1)$$

as the sum of a cost  $E_W$  for work, and another cost  $E_R$  for force rate. The work cost depends on positive and negative efficiencies for muscle,  $\eta^+$  and  $\eta^-$  respectively (11), defined as work divided by metabolic energy (superscript + or - for positive and negative work, respectively). The energetic cost was therefore defined by actuator work ( $W_m$  per step, and power  $P_m$  for work per time, superscripts for positive and negative work),

$$E_W = \int_0^T \left( \frac{P_m^+}{\eta^+} - \frac{P_m^-}{\eta^-} \right) dt \quad (2)$$

Force-rate was added as a separate cost from work, motivated by two observations. First, metabolic cost has been observed to increase with intermittent bursts or rapid cycles of force, even under isometric conditions where little or no work is performed (24,31–33), or in cyclic movements where work is kept constant (23,25). Second, Actuator-only models with work as the only cost result in unrealistically impulsive ground reaction forces (14), whereas the addition of a force-rate cost produces more human-like forces (26). We therefore included a force-rate cost  $E_R$ , increasing with the integral of the force rate squared over a single step,

$$E_R = \epsilon \int_0^T \dot{F}_m^2 dt \quad (3)$$

where  $\dot{F}_m$  is the first derivative of actuator force and  $\epsilon$  is a cost coefficient. Variations on this formulation have been examined in previous locomotion models, with differences in the exponent or degree of

derivative (26,34–39). But these variations often produce relatively similar effects on optimal gait models (26), and so a single representative formulation is used here.

The optimization was subject to boundary conditions for periodicity and continuity with a ballistic flight phase. Additional constraints included a maximum allowable stance leg length  $L$ , and vertical ground reaction forces only able to act upward. The optimization determined the leg's posture at touchdown and did not allow slipping of that contact. Model states included the position and velocity of the point-mass body and the first and second derivatives of the actuator's length to facilitate inclusion of work and force-rate in the objective function.

All optimizations were conducted with the MATLAB software GPOPS-II (40) and the resulting nonlinear problem was solved using SNOPT (41). All variables and equations were non-dimensionalized with parameter combinations ( $L = 0.90$  m,  $M = 70$  kg and  $g = 9.81$  m · s<sup>-2</sup>) during optimization and outputs were subsequently re-dimensionalized as indicated in figures. Further details regarding the model and implementation of the optimization problem can be found in the Supporting Information (S1 Appendix) associated with this manuscript.

Running parameters were chosen to represent human-like gait. Speed  $v$  was varied over a range of 2 – 4 m · s<sup>-1</sup>, with empirical preferred step frequency given by  $f = 0.26v + 2.17$  (42). Step length  $s$  was defined as the distance travelled over one periodic step, and step frequency  $f$  as the inverse of time duration,  $T$ , per step (i.e.  $T = 1/f$ ), such that  $v = s \cdot f$ . Gaits were produced while varying parameters such as tendon stiffness (4.93 – 122 kN · m<sup>-1</sup> or equivalently, 6.46 – 160  $MgL^{-1}$ ) and force-rate coefficient ( $1 \cdot 10^{-4} - 2 \cdot 10^{-2} M^{-1}g^{-1.5}L^{1.5}$ ) and were compared against human ground reaction forces.

For comparison with our model, we included representative human data to qualitatively illustrate well-established patterns for ground reaction forces and other trajectories. The data consist of one representative subject from a separate published study (43): a male (25 years, body mass = 75.3 kg, leg

length = 0.79 m) running on an instrumented force treadmill at  $3.9 \text{ m} \cdot \text{s}^{-1}$ . An average step was determined from 20 s of steady-state ground reaction force data and used in plots including CoM power (44) and vertical acceleration vs. displacement (2,4), as comparison against the model. These plots reproduce patterns from accepted literature, and so no statistical analysis was performed.

## Results

Optimization results are presented in two parts, first examining the effects of individual model components (Fig. 2), and then combining them into a single, unified model. Part I presents individual sensitivity studies, beginning with the Spring-mass and Actuator-only models, which have been examined in prior literature: e.g. (2,4) and (26,34,38), respectively. Next, the Actuated Spring-mass model is evaluated as an alternative, since it still uses a spring but also requires an actuator to account for passive energy dissipation occurring with each step. Initially, this model is evaluated with work as the sole cost objective (i.e. no force-rate cost) over varying speeds and spring stiffnesses. Next, force-rate cost is introduced so changes in actuation strategies may be independently evaluated. Finally, in Part II, a single, unified set of parameters is applied to the Actuated Spring-mass model, which is then used to simulate gait over a range of running speeds, spring stiffnesses and ground slopes to assess its utility in predicting locomotion energetics and optimal spring-actuator coordination patterns.

### **Part I: Individual model components and their contributions to running behavior**

#### ***Spring-mass and Actuator-only models produce similar pseudo-elastic running gaits***

Both models (Fig. 3) can produce similar gaits, ranging from very flat to very bouncy. For the Spring-mass model at a given speed and step length, the spring stiffness determines the gait trajectory, as described

by CoM trajectories, vertical ground reaction force profiles, mechanical power profiles, and vertical work loop curves illustrating the spring-like leg behavior (4). As reported by others (3), the Spring-mass model can run with a vast range of stiffnesses  $k$  (Fig. 3, top). A less stiff (or more compliant) spring can produce grounded running, in which the stance phase occupies the entire step (blue curves in Fig. 3). With greater stiffness comes a flight phase, yielding gaits that resemble more typical human running, where both stance and flight phases are finite in duration (redder curves, Fig. 3). These gaits generally include a single-peaked ground reaction force profile, with higher peak forces and powers with increasing stiffness, as well as steeper vertical work loop curves during stance. In the limit toward infinite stiffness, the model produces impulsive running (14), where flight takes up nearly the entire step and stance occurs as an instantaneous impulse (red arrows, Fig. 3). In all cases, the Spring-mass model is purely elastic and has no actuator and no losses. Thus, no single spring stiffness, and no single spring-like gait, can be considered beneficial over another in terms of energy cost.

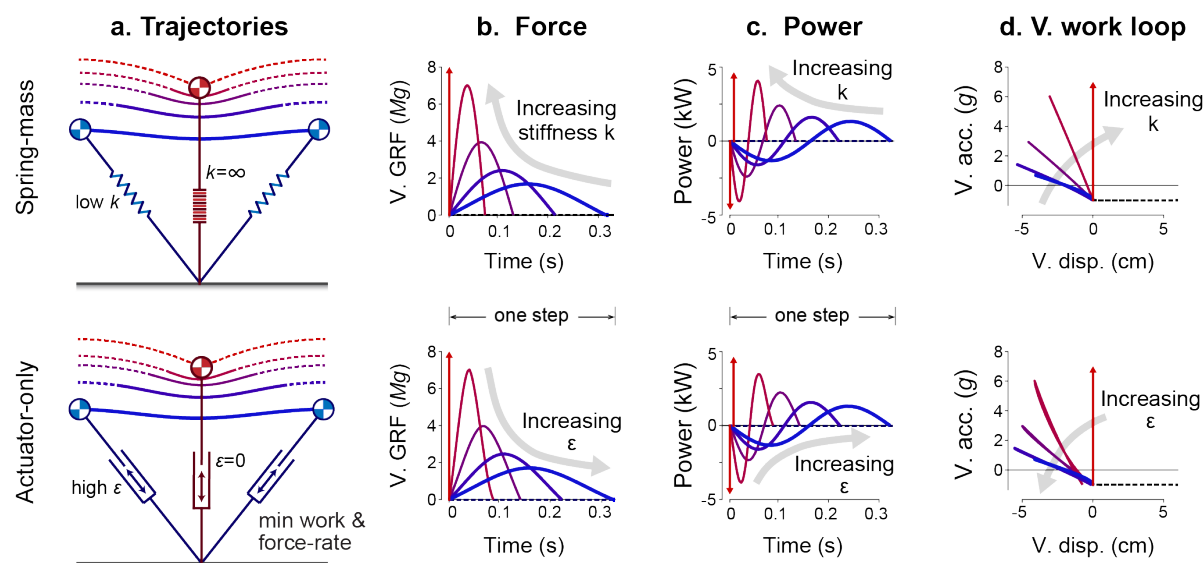

**Fig 3. Running gaits from the Spring-mass (top) and Actuator-only (bottom) models.**

They are illustrated by (a) center of mass (CoM) trajectory, (b) vertical ground reaction forces vs. time, (c) leg power performed on the CoM vs. time, and (d) vertical acceleration vs. vertical displacement of the body (or vertical work loop curve). A range of running gaits are shown, varying stiffness  $k$  in the Spring-mass model, and the force-rate cost coefficient  $\epsilon$  for a single running speed  $v$  ( $3.5 \text{ m} \cdot \text{s}^{-1}$ ) and step frequency  $f$  (3 Hz). In the limiting case of infinite spring stiffness or zero force-rate cost, touchdown forces become perfectly impulsive (red arrows).

The Actuator-only model can produce a very similar range of running gaits, despite the complete lack of an elastic spring (Fig. 3, bottom). The optimization produces pseudo-elastic behavior resembling a spring, and tuned by a single parameter, the force-rate coefficient  $\epsilon$ . With a coefficient of zero (i.e. work cost only), impulsive running is optimal, because least work is performed with least displacement, albeit with infinite force (14). A greater force-rate cost results in increasing stance time and shorter flight time, more similar to humans. Increasing that cost further eventually causes the flight phase to disappear, producing grounded running similar to a very compliant spring. For any non-zero force-rate cost, the

model consistently produces an approximately linear vertical work loop curve, similar to the Spring-mass model. However, this behavior is purely active and requires substantial positive and negative work. As a result, the Actuator-only model does incur an energy cost for work but has no passive elasticity to reduce that work.

We thus find that the two diametrically opposed models can reproduce the pseudo-elastic behaviors similar to humans, whether or not there is true passive elasticity. There is certainly strong evidence that elasticity is important for running in humans and other animals, but spring-like ground reaction forces and vertical work loop curves are not necessarily indicative that elasticity is the dominant mechanism in running. If it were, the energetic cost of running might be expected to be close to zero. Conversely, the pure Actuator-only model also obviously cannot demonstrate that humans are purely inelastic. The work performed by humans, if there were no elasticity, would result in unrealistically high muscle efficiencies of at least 45% (7). It is more realistic to regard the human as having some combination of series elasticity and active actuation, both contributing to the actual energetic cost of human running.

### ***Dissipative energy losses require compensatory, active positive mechanical work***

We next consider the effect of passive energy dissipation in the Actuated Spring-mass model (Fig. 4), optimizing work cost alone. Again, gaits roughly similar to those of humans are produced, for either stiff or compliant springs. However, the actuator must perform positive work to restore the lost energy. With a stiff spring, it is optimal to produce a relatively “bouncy” CoM trajectory where the body spends more time in the air and thus, reaches greater heights above the ground (Fig. 4a). The optimum also favors a spikier vertical force and power over shorter stance durations (Figs. 4b & 4c). Conversely, a compliant spring makes it optimal to produce a “flatter” CoM trajectory with briefer flight time (Fig. 4a), with lower peak vertical force, longer stance duration, and less stiff vertical work loop curves (Fig. 4d). The

accompanying leg angle at touchdown also varies, with a more vertical orientation for increasing spring stiffness.

With work as the sole cost, it is generally optimal to perform only positive actuator work. For steady motion, the energy lost to hysteresis and collision must be restored with an equal magnitude of positive work, to yield zero net work per step. The optimization reveals this is performed most economically in the second half of stance (Fig. 4c, blue shaded areas), in concert with elastic energy return from the spring. It is also generally economical to completely avoid active negative work, which would also require an additional amount of positive work to be performed. Thus, actuator work is minimized when it is performed only to restore dissipative losses.

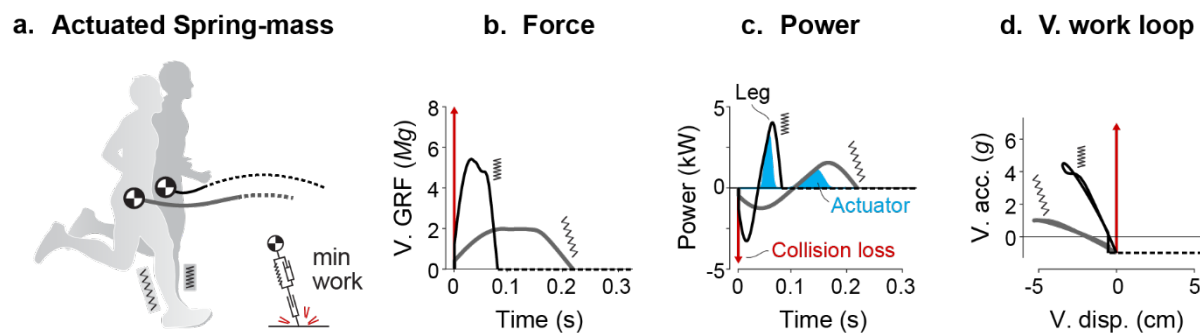

**Fig 4. Effects of stiff vs. compliant springs on Actuated Spring-mass model minimizing work alone.**

Optimal running gaits (speed  $v$  of  $3.0 \text{ m} \cdot \text{s}^{-1}$ ) are shown for the Actuated Spring-mass model, including (a) CoM trajectory, (b) vertical ground reaction forces (V. GRF) vs. time, (c) leg power vs. time, and (d) vertical acceleration vs. vertical displacement (V. acc. vs. V. disp.). The model includes passive dissipation (hysteresis and collision), optimized for two spring stiffnesses  $k$  ( $13.7 \text{ kN} \cdot \text{m}^{-1}$  for compliant and  $109.5 \text{ kN} \cdot \text{m}^{-1}$  for stiff). The stiffer spring yields a more vertical leg, shorter stance time and bouncier gait, with higher peak forces and leg power. Net actuator work is similar in both cases.

## ***Dissipative losses are minimized by increasing spring stiffness with running speed***

We next evaluate a range of spring stiffnesses and running speeds to determine how actuator work, as the sole cost, may be minimized (Fig. 5). Here we find that optimal spring stiffness increases with running speed (Fig. 5a), while generally preserving the timing of positive work within the second half of stance (Fig. 5b). At lower speed  $v$  ( $2.5 \text{ m} \cdot \text{s}^{-1}$ ; Fig. 5a left), both hysteresis and collision losses are reduced with less spring stiffness. However, at higher speed ( $3.5 \text{ m} \cdot \text{s}^{-1}$ ; Fig. 5a right), hysteresis losses are reduced with greater stiffness whereas collision losses are relatively unchanged. For a moderate speed ( $3.0 \text{ m} \cdot \text{s}^{-1}$ ; Fig. 5a middle) both hysteresis and collision trade off over stiffness, and an intermediate stiffness is optimal. Overall, hysteresis losses change mainly with spring stiffness, and collision losses increase mainly with running speed, so that losses are generally minimized by a stiffness increasing with speed.



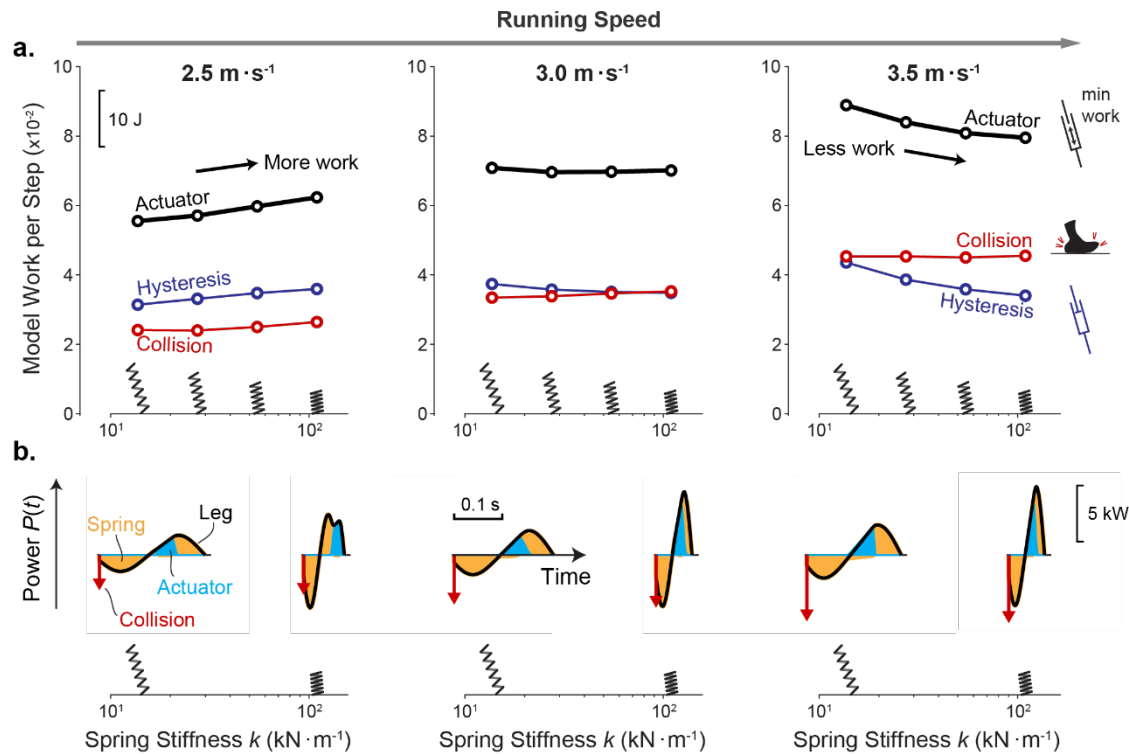

**Fig 5. Actuator work and power as a function of spring stiffness and running speed in the Actuated Spring-mass model, minimizing work alone.**

(a) Work vs. stiffness for speeds of 2.5 – 3.5 m · s<sup>-1</sup>. Shown are active Actuator work (black), Collision work magnitude (red), and Hysteresis work magnitude (blue). Spring diagrams (inset) illustrate touchdown angles for each stiffness. (b) Power vs. time for very compliant and very stiff springs, for each running speed. Shown are net Leg power (black lines), Spring power (orange shaded area), Actuator power (blue shaded area). Results are for spring stiffness ranging 13.7 – 109.5 kN · m<sup>-1</sup>.

The collision and hysteresis losses have distinct dependencies on running speed and/or stiffness. The model's collision loss increases with touchdown velocity and thus, running speed, but is relatively insensitive to spring stiffness. Stiffness does affect the CoM trajectory and the distribution between

horizontal and vertical velocity components but has relatively little effect on the vector magnitude.

Overall, collision losses increase with speed but are relatively unaffected by spring stiffness (Fig. 5).

In contrast, hysteresis loss occurs as a fraction of elastic strain energy, which is largely determined by the angle of the leg during stance. For example, a vertical leg posture is used in conjunction with a stiff spring (Fig. 4), and this results in greater strain (and hysteresis losses) to redirect vertical CoM velocity of the bouncer gait. Alternatively, a less vertical leg posture is used with a compliant spring and results in greater strain to redirect horizontal velocity of the body. As such, stiff springs allow for efficient gait at higher speeds, since the vertical leg is effective at mitigating excessive strain to redirect high horizontal CoM velocity. At lower speeds, compliant springs are better since a less vertical leg is better at mitigating higher vertical velocity associated with bouncy running at these speeds. Nevertheless, extremely compliant springs are always more costly since the actuator must do extra work on the spring simply to produce enough force to support body weight.

The overall effects of dissipation are as follows. At low speeds, both collision and hysteresis losses are reduced with relatively low spring stiffness and a shallower leg touchdown angle, thereby also reducing actuator work. But at higher speeds, hysteresis losses are actually reduced by greater spring stiffness and steeper leg touchdown angle, so that actuator work is minimized with relatively high stiffness. These effects together cause the optimal spring stiffness for minimizing actuator work to increase with running speed.

### ***An added force-rate cost favors active actuator dissipation***

We have thus far found that the minimum-work model avoids active negative work, whereas some muscles are observed to perform both negative and positive work (5). Perhaps there is some energetic advantage to active negative work, not explained by a work cost alone. In fact, the addition of a force-rate cost with coefficient  $\epsilon$  (Fig. 6) makes it favorable for the actuator to perform both negative and

positive work. This distributes ground reaction forces over a longer stance duration with lower peak forces and reduced force rate. However, it also comes at the expense of additional actuator work, which is made worthwhile by its capacity to reduce force rate (Fig. 6). Overall, the force-rate cost yields less impulsive forces and smoother CoM trajectories, at the expense of active dissipation and increased work.

The added force-rate cost yields a shift in timing of positive work so that it is optimally performed late in stance. Experiments have shown that the triceps surae muscles undergo substantial shortening throughout stance, but particularly late in stance, during human running (16,17). On the other hand, negative work is optimally performed early in stance as ground reaction forces rise (5,45).

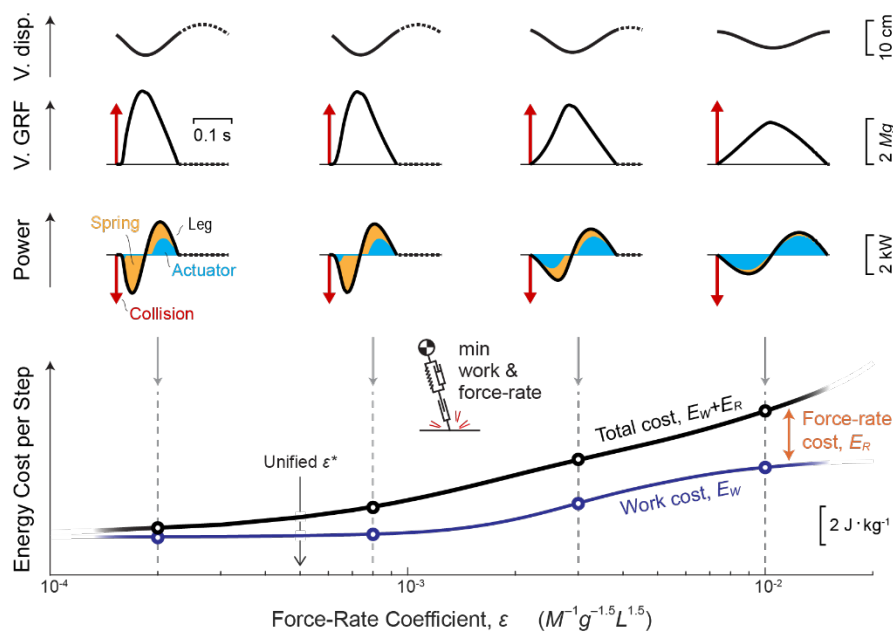

**Fig 6. Effect of work and force-rate costs on running using Actuated Spring-mass model.**

(top:) Vertical CoM displacement vs. time, vertical GRF vs. time, and Leg power vs. time, for varying force-rate cost coefficient  $\epsilon$ . (bottom:) Actuator work cost  $E_W$  (thin blue line), Total cost  $E_W + E_R$  (work and force rate, solid black line), and Force-rate cost  $E_R$  (difference between lines) vary with the

coefficient. Impulsive actions (red arrows, V. GRF and Leg power) occur at Collision, and overall leg power (solid black line) includes contributions from the Spring and Actuator. All solutions are shown for  $v$  of  $3 \text{ m} \cdot \text{s}^{-1}$  and  $f$  of 2.94 Hz.

## **Part II: Unified Actuated Spring-mass model of human-like running and energy expenditure**

We next apply the Actuated Spring-mass model with a single, unified set of parameter values selected to produce human-like running in a variety of conditions. The full model therefore includes an elastic spring, both hysteresis and collision losses, and an objective to minimize both work and force rate. A single force-rate coefficient is selected ( $\varepsilon^*$  of  $0.5 \cdot 10^{-3}$ ) for resemblance to human data, along with stiffness  $k^*$  of  $35.6 \text{ kN} \cdot \text{m}^{-1}$ , positive work efficiency  $\eta^+$  of 32%, and negative work efficiency  $\eta^-$  of -105%. The resulting model, with parameters thus fixed, is then applied to three comparisons with human data: mechanics of a nominal gait, energetic cost as a function of running speed, and energetic cost as a function of ground slope.

### ***Unified model produces human-like gait mechanics***

The resulting model qualitatively matches the human CoM trajectory (Fig. 7a), vertical ground reaction forces (Fig. 7b), leg power vs. time (Fig. 7c), and vertical acceleration vs. displacement (Fig. 7d). The model also reproduces some features that the classical Spring-mass model cannot, such as the brief initial peak at touchdown (from collision, Fig. 7b) and a more gradual decrease in force than the increase (temporal asymmetry, Fig. 7b). The model collision produces a transient burst of negative power followed by elastic energy storage and return (about 53%; Fig. 7c), as well as slightly non-linear vertical work loop curves (Fig. 7d), qualitatively similar to human. Whereas the Spring-mass model produces a nearly linear curve that retraces itself almost perfectly (Fig. 1d), the human curve has an initial transient

and self-intersecting profile resembling a tilted figure-eight. The shape indicates hysteresis with a dissipative counter-clockwise loop, followed by a (positive work) clockwise loop. The present model crudely reproduces these broad features, even if imperfect in detail.

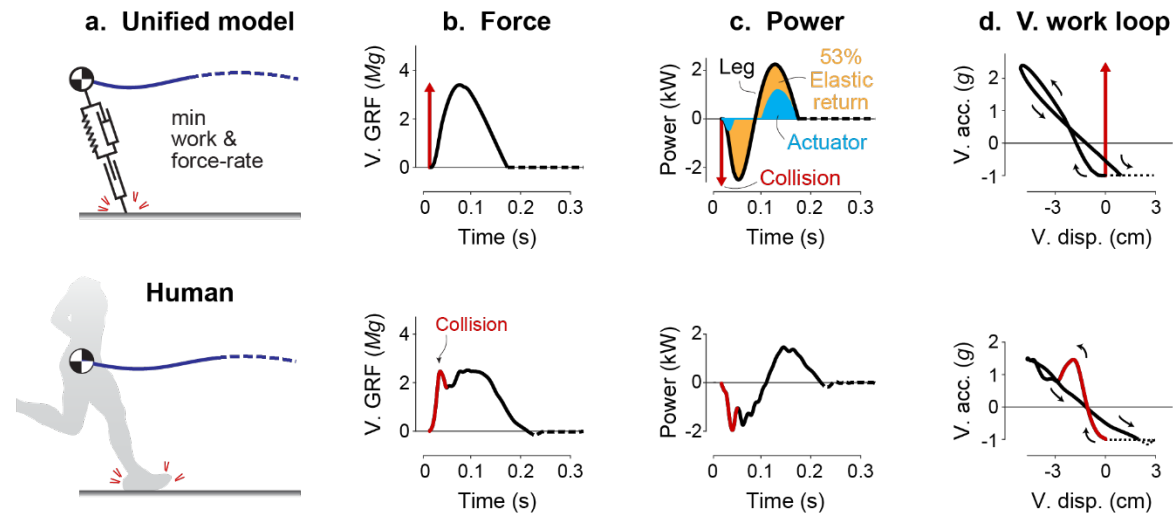

**Fig 7. Comparison of Unified Actuated Spring-mass model (top) including work and force-rate costs against human data (bottom).**

Shown are (a) CoM trajectories, (b) vertical ground reaction forces, (c) Leg mechanical power, and (d) Vertical Acceleration vs. Displacement. Initial force transients are highlighted (red impulse arrow for model, red line for human). In (c), spring (orange shaded area) and Actuator work (blue shaded area) contributions are shown. Gait parameters  $v$  and  $f$  are  $3.9 \text{ m} \cdot \text{s}^{-1}$  and  $3 \text{ Hz}$ , respectively. Stiffness and force-rate coefficient in the model are selected to approximately match stance time duration:  $k^*$  is  $35.6 \text{ kN} \cdot \text{m}^{-1}$  and  $\epsilon^*$  is  $0.5 \cdot 10^{-3}$ .

# ***Unified model has increasing energy cost with speed for level running***

The model's energetic cost per time (Fig. 8a) increases with running speed at a rate similar to human data (46). Here, the model's step frequency was constrained to the empirical human preferred step frequency, but other parameters were kept fixed. The increasing overall cost with speed may be explained by the constituent force-rate and work costs (Fig. 8b), evaluated as a function of spring stiffness and speed. The work cost is considerably greater in magnitude than the force-rate cost (e.g., 68% vs. 32%, respectively at  $3 \text{ m} \cdot \text{s}^{-1}$ ) and increases more as a function of speed, primarily for restoring collision losses. Thus, most of the model's overall cost for running at higher speeds is due to increased actuator work, which is not included in the Spring-mass model.

Nevertheless, the force-rate cost has a large influence on the model's gait as a function of spring stiffness (Fig. 8b). Greater stiffness is associated with more impulsive ground reaction forces and briefer stance durations (as in Fig. 4), thus resulting in higher force-rate cost. Furthermore, the actuator performs additional negative (and therefore also positive) work with greater stiffness as a trade-off against even higher force-rate costs (like in Fig. 6). Overall, the presence of a force-rate cost makes particularly stiff springs more costly to the model and may indicate benefits of some compliance when running.

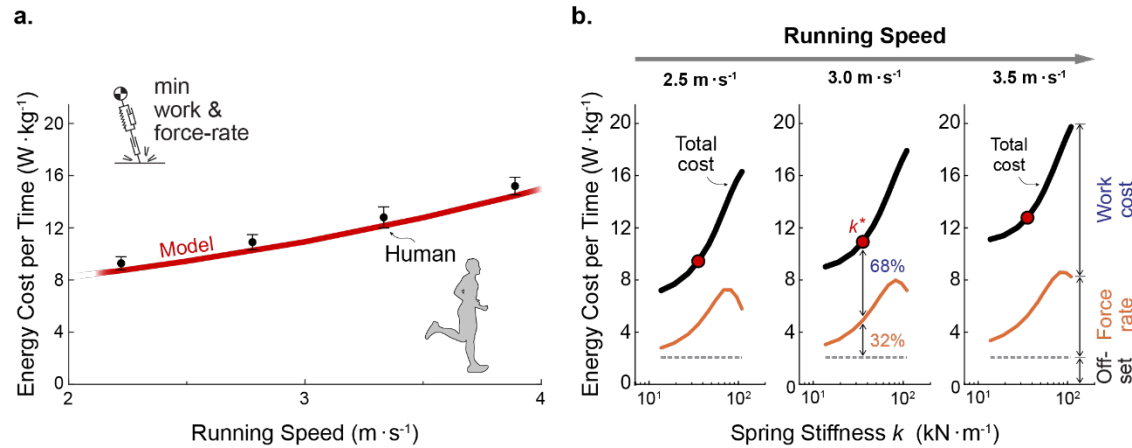

**Fig 8. Unified model energy cost vs. speed and spring stiffness, including force-rate cost.**

(a) Energetic cost per time versus speed is shown for the Actuated Spring-mass model ( $k^*$  of  $35.6 kN \cdot m^{-1}$ ,  $\varepsilon^*$  of  $0.5 \cdot 10^{-3}$ ; red curve) and for empirical metabolic data of human subjects running on a treadmill (mean  $\pm$  standard deviation.; (46)). Model cost includes work and force-rate costs, plus a constant offset associated with human resting metabolism (dashed horizontal line). (b) The model's energetic cost is shown for three speeds  $v$  ( $2.5 - 3.5 m \cdot s^{-1}$ ) and with parameter variation of spring stiffnesses  $k$  ( $13.7 - 109.5 kN \cdot m^{-1}$ ), with total cost (black lines), force-rate cost (difference between offset and magenta lines), and actuator work cost (difference between total and magenta lines). The unified model's spring nominal stiffness  $k^*$  is indicated (red line in a, red symbol in b).

### **Unified model explains energetic cost of running on inclines**

The model may also be applied to uphill and downhill running. In humans, metabolic cost asymptotically converges toward the costs of muscle performing positive and negative work (about 25% and -120%, respectively; (11)). At intermediate slopes, the cost smoothly transitions between these two extremes, passing through the cost for level running. The unified model produces a similar cost curve (Fig. 9a), with similar asymptotes. However, the force-rate cost adds to work costs in such a way that the human

asymptotes are actually achieved with slightly different positive and negative actuator efficiencies (32% and -105%), though consistent with estimates on cross-bridge efficiency (47).

The model's energetic cost is dominated by positive and negative work at steeper upward and downward slopes, respectively (Fig. 9b). Of course, increasing work is required of steeper slopes, but force-rate becomes less costly at those extremes. Additionally, for slopes surrounding zero, the force-rate cost contributes to the relatively smooth transition from positive to negative efficiency tangent lines identified by Margaria (11). The minimum of the cost curve occurs approximately where passive energy dissipation approaches the net negative mechanical work of descending the ground slope (about -0.08 slope) and is consistent with simple collision models indicating optimal running slopes (48). The force-rate cost is relatively high for shallow slopes and level ground, because it favors more impulsive forces that take advantage of passive dissipation to reduce active negative work. While even more passive dissipation at steeper negative slopes could reduce work costs further, this would come at a higher force-rate cost. In fact, it is less costly overall to actively dissipate energy at steeper slopes to avoid a high force-rate, but at increased work cost.

Parameter variation was used to assess the model's cost sensitivity to spring stiffness  $k$  (Fig. 9c), force-rate coefficient  $\epsilon$  (Fig. 9d), damping ratio  $\zeta$  (Fig. 9e) and collision fraction CF (Fig. 9f). Costs generally increase with each of these parameters, particularly for shallow and level slopes. For example, increasing spring stiffness resulted in greater energy cost, largely due to increased force-rate cost associated with more impulsive forces. Greater force-rate coefficient was also more costly, since total cost is proportional to the coefficient (Fig. 6). Increasing either dissipation parameter resulted in relatively modest increases in cost, mainly because more dissipation must be offset by more active work. But the overall result is that, even for extreme parameter variations, the cost of running up or down steeper slopes still tends to asymptote toward positive and negative work efficiencies. On shallow



and level slopes, each parameter contributed toward a non-zero cost, resulting in an overall cost comparable to human (Fig. 9a).

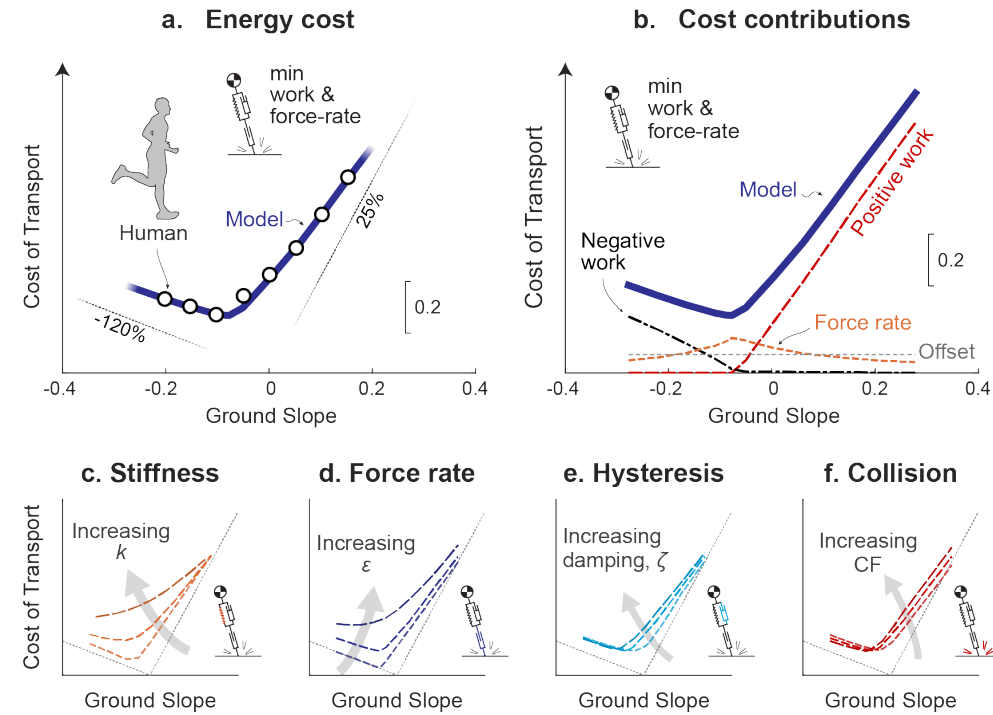

**Fig 9. Energetic cost of running vs. ground slope for unified Actuated Spring-mass model.**

(a) Model Cost of Transport (solid line) compared to humans (circles; (11)). Also shown are asymptotes (thin lines) for muscle efficiency of positive and negative mechanical work (25% and -120%, respectively). (b) Contributors to model Cost of Transport: positive work cost, negative work cost, force-rate cost  $E_R$ , and a constant offset. Parameter sensitivities are included for varying (c) stiffness  $k$ , (d) force-rate coefficient  $\epsilon$ , (e) hysteresis (damping ratio  $\zeta$ ), and (f) collision fraction  $CF$ . Each trace indicates variation from lowest to highest parameter values:  $k$  ranging  $13.7 \text{ kN} \cdot \text{m}^{-1} - \infty$ ,  $\epsilon$  ranging  $0 - 2 \cdot 10^{-3}$ ,  $\zeta$  ranging  $0 - 0.2$ ,  $CF$  ranging  $0 - 0.06$ . All model results are for nominal running at speed of  $3 \text{ m} \cdot \text{s}^{-1}$  and step frequency of 2.94 Hz.

## Discussion

We have proposed several additions to the Spring-mass model that help to explain the energy expenditure of running. The Actuated Spring-mass model includes passive energy dissipation, active work, and an additional energetic cost related to force-rate. In combination, these elements show how running can still cost substantial energy, even though series elasticity acts conservatively to reduce the active work required of muscle. We next re-examine each of the elements individually, to consider both the justification and the contribution of each to an overall model of running.

### ***Active work dominates energy expenditure despite elastic return***

The primary energetic cost observed in the models considered here was for active work. Empirical estimates based on work during human running, along with assumed 50% elastic energy return, suggest that active work could account for 76% of the energetic cost (21). Our model also had substantial elastic energy return, for example 53% at a speed of  $3.9 \text{ m} \cdot \text{s}^{-1}$  (Fig. 7), yet mechanical work still accounted for 66 – 70% of the overall energetic cost over the range of speeds considered,  $2.5 - 3.5 \text{ m} \cdot \text{s}^{-1}$ .

The unified model actively performed both positive and negative work (Fig. 7). Empirical measurements reveal modest active lengthening (and thus negative power) during early stance in humans (vastus lateralis; (45)) and in turkeys (lateral gastrocnemius; (5)). The perspective provided by our model is that such active negative work should generally be avoided if work were the only energetic cost. But active dissipation may be justified by opposing costs such as for force rate (Fig. 8), which justify performing active negative work and extending stance durations (e.g. Fig. 7c), but at the cost of yet more positive work to offset the active dissipation. The performance of active positive and negative work on level ground also explains the smooth transition in cost between uphill and downhill slopes. A leg that actively performs negative work on the level should simply perform more such dissipation for downward slopes, and less for upward slopes, and similarly for positive work, with cost asymptotes defined by work

performed against gravity alone (11). Even if passive elasticity performs most of the work of running, the remaining active work by muscles (16,17,45) could still explain much of the overall energetic cost. The model also reproduces empirical correlations with energy cost. Kram and Taylor (49) observed energy costs increasing with speed, and proportional to body weight divided by ground contact time. The present unified model also yields similar correlations (cost proportional to inverse contact time, and inverse contact time to speed,  $R^2 = 0.95$  and  $R^2 = 0.98$  respectively), but as an outcome of optimizing costs for work and force rate. In fact, a simple analysis demonstrates that mechanical work of a series actuator can explain this proportionality explicitly (21, supplementary material). We do not consider contact time to be a direct determinant of cost, because running (with constant body weight) with an especially flat CoM trajectory results in both greater contact time and greater energy cost (50). Rather, a mechanistic energy cost from actuator work and force can potentially explain why quantities such as contact time can appear correlated (or not) with cost.

### ***Passive dissipation is a major determinant of mechanics and energetics of running***

There are several features of running that are reproduced by the inclusion of dissipation. Dissipative losses are the primary driver of active mechanical work, which is needed to offset losses and obtain the zero net work of a periodic gait cycle. Even a relatively small amount of dissipation can be costly. For example, the unified model passively dissipated less than 5% of the body's mechanical energy and passively returned 59% of positive shortening work at  $3 \text{ m} \cdot \text{s}^{-1}$  (compared to 60% in turkey; (8)), yet the remaining active positive work can still explain 61% of the net metabolic cost of equivalent human running. We also found dissipation (particularly collision loss) to increase substantially with running speed, and therefore contribute to greater energy expenditure rate (Fig. 8). Passive dissipation also helps to explain some time-asymmetries in running. For example, in humans the vertical ground reaction force increases faster early in stance than it decreases later in stance (Fig. 7b).

Such asymmetries have previously been attributed to the muscle force-velocity relationship (51) and to dissipation (52). The present model predicts such asymmetry to be energetically optimal (Fig. 7b). Given the leg extends after mid-stance when forces are already decreasing, the leg must undergo net extension by the time of take-off. (Fig. 7d). The model also predicts a more vertical leg orientation during touchdown versus at take-off to reduce dissipation similar to humans (52). Furthermore, the model experiences a brief transient in ground reaction force and work at touchdown (Fig. 7b and c), similar to human foot contact.

This contrasts with the other models considered here. The Spring-mass model produces more time-symmetric trajectories (Fig. 3) lacking initial transients and predicts zero active work. The Actuator-only model also produces symmetric trajectories since it has no passive dissipation. However, it lacks passive elasticity resulting in cost over twice that of equivalent human running (Fig. 3, bottom column). The time asymmetries in force and work profiles might seem like minor details, but here they are emergent from energy optimality. Passive dissipation helps to explain these asymmetries and is a major contribution to the energetic cost modeled here.

### ***Elastic tendon is critical to energy economy but not the pseudo-elastic mechanics of running***

We next re-examine whether long, compliant tendons are helpful for locomotion economy (5,6,53). If the total work per step from muscle and tendon were fixed, a more compliant tendon could indeed perform more of the work passively, and thus reduce the energetic cost. But in running, the total work need not be fixed, and changing the series stiffness also yields a different optimal trajectory (Fig. 4), and a different amount of total work for a given speed and step length. In our model, with work as the sole cost, a stiffer spring is actually more economical at higher speeds ( $3.5 \text{ m} \cdot \text{s}^{-1}$ , Fig. 5). The optimal trajectory yields lower spring displacement and hysteresis loss, and thus, less active work.

Another potential factor for compliance is the proposed force-rate cost. Avoidance of that cost can favor more active work (Fig. 8), and overall cost may indeed be reduced with more compliance. More complex running models have also suggested that the optimal compliance may actually be different for each muscle (54). Of course, there may also be other benefits to tendon compliance beyond economy (55). But for running economy alone, there is no general prescription that favors greater tendon length or compliance.

Tendon compliance has long been implicated in the spring-like mechanics of running. This is manifested in CoM trajectories, ground reaction forces, power, and vertical work loop curves (Fig. 3), which are all suggestive of elastic behavior. But all the models considered here, including those with dissipation and actuation, and even those with no elasticity at all (Actuator-only Model, Fig. 3) also exhibit similar pseudo-elastic behavior. In models, springs are also not critical to the economical advantage of running over walking at high speeds (14), nor to the general cost trends for running on slopes (Fig. 9c). This is not to diminish the importance of elasticity, which allows leg muscles to operate at lower and more efficient shortening velocities (5), and store and return substantial energy. But the basic resemblance of running to elastic bouncing, and the associated pseudo-elastic mechanics (e.g., Fig. 3), should not be regarded as evidence of true elasticity in running.

### ***Force-rate cost contributes to mechanics and energetics of running***

In addition to the cost of active work, our model also includes an energetic cost for force rate. Such a cost has been experimentally observed in tasks such as cyclic muscle contractions (24,33), and was included as an energetic penalty for rapid transients in force production. We found that work as the only energetic cost tended to favor overly impulsive running motions (Fig. 6). The force-rate cost acts as a trade-off against work, resulting in reduced peak ground reaction forces and longer stance durations, more similar to human data (Fig. 7). The trade-off also makes it economical to perform active negative

work, and to favor more compliant series elasticity, contributing to more human-like mechanics (Fig. 7) and energetics (Fig. 8). Work alone also reveals a particularly economical strategy for running downhill, where only a minimal amount of active negative work is performed to dissipate gravitational potential energy. However, humans expend more than the predicted amount of energy, perhaps because the force-rate makes such a strategy more costly, resulting in a smoother transition toward the negative work asymptote observed experimentally (11). The force-rate cost produces these effects despite a relatively modest energetic cost. In the unified model, force-rate accounts for only 32% of energetic cost, compared to 68% for work (Fig. 8). And across slopes, work alone predicts too low an energetic cost for running (Fig. 9d). A cost such as force-rate is thus helpful for explaining human-like energetics.

## Limitations

The running model proposed here has a number of limitations, with regard to passive dissipation, actuator costs and running dynamics. For dissipation, we modeled hysteresis during leg compression alone to reproduce empirically estimated energy losses, without a detailed model of hysteresis mechanics. Similarly, we modeled collision losses with a simple reduction in momentum at touchdown, without considering the direction and mechanical properties of the body mass experiencing impact. To our knowledge, most models of running do not include explicit dissipation. We consider the present model to be an indicator that dissipation is important, but also in need of better-informed dissipation mechanics. The same is true for our model of energetic cost, intended to extend Spring-mass models with a highly simplified dependence on active mechanical work. Our model also stands to be improved with other features potentially relevant to running, such as muscle moment arms and force-velocity relationships (e.g., 56).

There are also limitations of the proposed energetic cost for force rate, which is not included in most other running models. This cost is intermediate in complexity between abstract “effort” costs such as

force squared (57,58), and more detailed models of muscle energetics (59,60), while also being supported by empirical data (e.g. 24–26,33,61). But the specific dynamics of such a cost in muscle are not well understood, with considerable uncertainty in the appropriate formulation. For example, we have found different derivative order and exponent (e.g., 2 and 1, respectively for Eq. 3) to yield similar forces (26) and agree well with empirical energy costs (23). We therefore regard the force-rate cost as a provisional implementation that stands for considerable improvement.

Similar to the Spring-mass model, the present model is also a gross simplification of human body dynamics. It is intended only to model basic features of running, such as pseudo-elastic mechanics and overall energy expenditure. More complexity would be required to address motion of multiple-jointed models, intersegmental dynamics, and activation or co-contraction of multiple muscles. For example, the model neglects a swing leg, whose active motion may also cost energy (22), and be exploited to modulate collision losses via active leg retraction just before touchdown (62,63). We also fixed step length and frequency with respect to running speed, whereas these could also be included in optimization for preferred gait parameters (e.g., 36). The present model only provides basic suggestions, that dissipation and energetic costs for work and force rate may be important for running. These suggestions are intended to apply to more complex models of running, but this remains to be tested.

## Conclusions

The energetic cost of running is not addressed by the classic Spring-mass model of running. Although elastic tissues store and return energy during stance, there is still some dissipation due to touchdown collision and hysteresis. For steady gait, these losses must be restored by active, positive work from muscle. The present Actuated Spring-mass model shows that even a relatively small amount of work can still incur a substantial energetic cost. It is also particularly costly to perform active negative work, because the associated losses must be restored by additional positive work. Muscles may also expend

energy for high rates of force development that make it economical to perform some active negative work, ultimately helping to explain the energetics of running at different speeds and slopes. Spring-like forces and other mechanics emerge from an actively controlled model optimized for economy, even if there were no elasticity. Series elasticity may be critical to saving energy, but active work and passive dissipation appear important for determining the energetic cost of running.

## Acknowledgments

The authors would like to thank Arash Khassestarash (University of Calgary) for sharing experimental data.

## Supporting Information

S1 Appendix. Dynamic optimization model details. (PDF)

## Data Availability

The source code and data used to produce the results and analyses presented in this manuscript are available from the Bitbucket Git repository: <https://bitbucket.org/hbcl/runoptsol/src/main/>



# References

1. Alexander RM. A model of bipedal locomotion on compliant legs. *Philosophical Transactions of the Royal Society of London Series B: Biological Sciences*. 1992;338(1284):189–98.
2. Blickhan R. The spring-mass model for running and hopping. *Journal of Biomechanics*. 1989 Jan;22(11–12):1217–27.
3. Geyer H, Seyfarth A, Blickhan R. Compliant leg behaviour explains basic dynamics of walking and running. *Proceedings of the Royal Society B-Biological Sciences*. 2006 Nov 22;273(1603):2861–7.
4. McMahon TA, Cheng GC. The mechanics of running: How does stiffness couple with speed? *Journal of Biomechanics*. 1990;23, Supplement 1:65–78.
5. Biewener AA, Roberts TJ. Muscle and tendon contributions to force, work, and elastic energy savings: a comparative perspective. *Exerc Sport Sci Rev*. 2000 Jul;28(3):99–107.
6. Bramble DM, Lieberman DE. Endurance running and the evolution of Homo. *Nature*. 2004 Nov;432(7015):345–52.
7. Cavagna GA, Kaneko M. Mechanical work and efficiency in level walking and running. *J Physiol*. 1977 Jun 1;268(2):467–81.
8. Roberts TJ, Marsh RL, Weyand PG, Taylor CR. Muscular Force in Running Turkeys: The Economy of Minimizing Work. *Science*. 1997 Feb 21;275(5303):1113–5.
9. Gan Z, Remy CD. A passive dynamic quadruped that moves in a large variety of gaits. In: 2014 IEEE/RSJ International Conference on Intelligent Robots and Systems. 2014. p. 4876–81.
10. Gan Z, Yesilevskiy Y, Zaytsev P, Remy CD. All common bipedal gaits emerge from a single passive model. *Journal of The Royal Society Interface*. 2018 Sep 30;15(146):20180455.
11. Margaria R. Positive and negative work performances and their efficiencies in human locomotion. *Int Z Angew Physiol*. 1968 May 28;25(4):339–51.
12. Taylor CR, Heglund NC, Maloiy GM. Energetics and mechanics of terrestrial locomotion. I. Metabolic energy consumption as a function of speed and body size in birds and mammals. *J Exp Biol*. 1982 Apr 1;97(1):1–21.
13. Long LL, Srinivasan M. Walking, running, and resting under time, distance, and average speed constraints: optimality of walk–run–rest mixtures. *Journal of The Royal Society Interface*. 2013 Apr 6;10(81):20120980.
14. Srinivasan M, Ruina A. Computer optimization of a minimal biped model discovers walking and running. *Nature*. 2006;439(7072):72–5.
15. Alexander RM. *Optima for Animals* [Internet]. Princeton, NJ: Princeton University Press; 1996 [cited 2020 Sep 5]. Available from: <https://press.princeton.edu/books/paperback/9780691027982/optima-for-animals>

- 662 16. Lai A, Lichtwark GA, Schache AG, Lin Y-C, Brown NAT, Pandy MG. In vivo behavior of the human  
663 soleus muscle with increasing walking and running speeds. *Journal of Applied Physiology*. 2015  
664 Mar 26;118(10):1266–75.
- 665 17. Lichtwark GA, Bougoulas K, Wilson AM. Muscle fascicle and series elastic element length changes  
666 along the length of the human gastrocnemius during walking and running. *Journal of*  
667 *Biomechanics*. 2007 Jan 1;40(1):157–64.
- 668 18. Lichtwark GA, Wilson AM. In vivo mechanical properties of the human Achilles tendon during one-  
669 legged hopping. *Journal of Experimental Biology*. 2005 Dec 15;208(24):4715–25.
- 670 19. Ker RF. The time-dependent mechanical properties of the human heel pad in the context of  
671 locomotion. *J Exp Biol*. 1996;199:1501–8.
- 672 20. Riddick RC, Kuo AD. Soft tissues store and return mechanical energy in human running. *Journal of*  
673 *Biomechanics*. 2016 Feb 8;49(3):436–41.
- 674 21. Riddick RC, Kuo AD. Mechanical Work Accounts for Most of the Energetic Cost in Human Running.  
675 bioRxiv: 10.1101/2020.09.22.309161 [Preprint]. 2020 [cited 2021 May 6]. Available from:  
676 <https://www.biorxiv.org/content/10.1101/2020.09.22.309161v1.abstract>
- 677 22. Doke J, Donelan JM, Kuo AD. Mechanics and energetics of swinging the human leg. *The Journal of*  
678 *experimental biology*. 2005;208(3):439–45.
- 679 23. Doke J, Kuo AD. Energetic cost of producing cyclic muscle force, rather than work, to swing the  
680 human leg. *Journal of Experimental Biology*. 2007;210(13):2390–8.
- 681 24. van der Zee TJ, Kuo AD. The high energetic cost of rapid force development in cyclic muscle  
682 contraction. *Journal of Experimental Biology* [Internet]. 2020 [cited 2020 Sep 8]; Available from:  
683 <https://www.biorxiv.org/content/10.1101/2020.08.25.266965v1>
- 684 25. Wong JD, Cluff T, Kuo AD. The energetic basis for smooth human arm movements [Internet].  
685 *Neuroscience*; 2020 Dec [cited 2021 Mar 17]. Available from:  
686 <http://biorxiv.org/lookup/doi/10.1101/2020.12.28.424067>
- 687 26. Rebula JR, Kuo AD. The Cost of Leg Forces in Bipedal Locomotion: A Simple Optimization Study.  
688 *PLOS ONE*. 2015 Feb 23;10(2):e0117384.
- 689 27. Xi W, Remy CD. Optimal gaits and motions for legged robots. In: 2014 IEEE/RSJ International  
690 Conference on Intelligent Robots and Systems. 2014. p. 3259–65.
- 691 28. Xi W, Yesilevskiy Y, Remy CD. Selecting gaits for economical locomotion of legged robots. *The*  
692 *International Journal of Robotics Research*. 2016 Aug 1;35(9):1140–54.
- 693 29. Chi KJ, Schmitt D. Mechanical energy and effective foot mass during impact loading of walking and  
694 running. *J Biomech*. 2005;38:1387–95.
- 695 30. Finni T, Peltonen J, Stenroth L, Cronin NJ. Viewpoint: On the hysteresis in the human Achilles  
696 tendon. *Journal of Applied Physiology*. 2013 Feb 15;114(4):515–7.

- 697 31. Bergstrom M, Hultman E. Energy cost and fatigue during intermittent electrical stimulation of  
698 human skeletal muscle. *Journal of Applied Physiology*. 1988;65:1500–5.
- 699 32. Chasiotis D, Bergström M, Hultman E. ATP utilization and force during intermittent and continuous  
700 muscle contractions. *J Appl Physiol*. 1987 Jul;63(1):167–74.
- 701 33. Hogan MC, Ingham E, Kurdak SS. Contraction duration affects metabolic energy cost and fatigue in  
702 skeletal muscle. *Am J Physiol*. 1998;274:E397-402.
- 703 34. Croft JL, Schroeder RT, Bertram JE. Determinants of optimal leg use strategy: horizontal to vertical  
704 transition in the parkour wall climb. *Journal of Experimental Biology*. 2019;222(1):jeb190983.
- 705 35. Handford ML, Srinivasan M. Robotic lower limb prosthesis design through simultaneous computer  
706 optimizations of human and prosthesis costs. *Sci Rep*. 2016 Apr;6(1):19983.
- 707 36. Kuo AD. A simple model of bipedal walking predicts the preferred speed-step length relationship. *J*  
708 *Biomech Eng*. 2001 Jun;123(3):264–9.
- 709 37. Polet DT, Bertram JEA. An inelastic quadrupedal model discovers four-beat walking, two-beat  
710 running, and pseudo-elastic actuation as energetically optimal. Donelan M, editor. *PLoS Comput*  
711 *Biol*. 2019 Nov 21;15(11):e1007444.
- 712 38. Schroeder RT, Bertram JE. Minimally Actuated Walking: Identifying Core Challenges to Economical  
713 Legged Locomotion Reveals Novel Solutions. *Front Robot AI*. 2018 May 22;5(58):58.
- 714 39. Schroeder RT, Bertram JEA, Son Nguyen V, Vinh Hac V, Croft JL. Load carrying with flexible bamboo  
715 poles: optimization of a coupled oscillator system. *J Exp Biol*. 2019 Dec 1;222(23):jeb203760.
- 716 40. Patterson MA, Rao AV. GPOPS-II: A MATLAB Software for Solving Multiple-Phase Optimal Control  
717 Problems Using hp-Adaptive Gaussian Quadrature Collocation Methods and Sparse Nonlinear  
718 Programming. *ACM Trans Math Softw*. 2014 Oct 27;41(1):1–37.
- 719 41. Gill PE, Murray W, Saunders MA. SNOPT: An SQP Algorithm for Large-Scale Constrained  
720 Optimization. *SIAM Rev*. 2005 Jan;47(1):99–131.
- 721 42. Gutmann AK. Constrained optimization in human running. *Journal of Experimental Biology*. 2006  
722 Feb 15;209(4):622–32.
- 723 43. Khassestarash A, Vernillo G, Kruger RL, Edwards WB, Millet GY. Neuromuscular, biomechanical, and  
724 energetics adjustments following repeated bouts of downhill running. *J Sport Health Sci*. 2021;
- 725 44. Arampatzis A, Knicker A, Metzler V, Brüggemann G-P. Mechanical power in running: a comparison  
726 of different approaches. *Journal of Biomechanics*. 2000 Apr;33(4):457–63.
- 727 45. Bohm S, Marzilger R, Mersmann F, Santuz A, Arampatzis A. Operating length and velocity of human  
728 vastus lateralis muscle during walking and running. *Scientific Reports*. 2018 Mar 22;8(1):5066.
- 729 46. Kipp S, Grabowski AM, Kram R. What determines the metabolic cost of human running across a  
730 wide range of velocities? *Journal of Experimental Biology*. 2018 Sep 15;221(18).

- 731 47. Barclay CJ. Chapter 6 - Efficiency of Skeletal Muscle. In: Zoladz JA, editor. Muscle and Exercise  
732 Physiology. Academic Press; 2019. p. 111–27.
- 733 48. Dewolf AH, Willems PA. Running on a slope: A collision-based analysis to assess the optimal slope.  
734 Journal of Biomechanics. 2019 Jan;83:298–304.
- 735 49. Kram R, Taylor CR. Energetics of running: a new perspective. Nature. 1990 Jul 19;346(6281):265–7.
- 736 50. McMahon TA, Valiant G, Frederick EC. Groucho running. Journal of Applied Physiology. 1987 Jun  
737 1;62(6):2326–37.
- 738 51. Cavagna GA. The landing–take-off asymmetry in human running. Journal of Experimental Biology.  
739 2006 Oct 15;209(20):4051–60.
- 740 52. Dewolf AH, Willems PA. A collision-based analysis of the landing-takeoff asymmetry during  
741 running. Computer Methods in Biomechanics and Biomedical Engineering. 2017 Oct  
742 30;20(sup1):S65–6.
- 743 53. Kielty M, Radke H. Radiolab: Man Against Horse [Internet]. [cited 2021 Mar 16]. Available from:  
744 <https://www.wnycstudios.org/podcasts/radiolab/articles/man-against-horse>
- 745 54. Uchida TK, Hicks JL, Dembia CL, Delp SL. Stretching Your Energetic Budget: How Tendon  
746 Compliance Affects the Metabolic Cost of Running. Zadpoor AA, editor. PLoS ONE. 2016 Mar  
747 1;11(3):e0150378.
- 748 55. Daley MA, Usherwood JR. Two explanations for the compliant running paradox: reduced work of  
749 bouncing viscera and increased stability in uneven terrain. Biol Lett. 2010 Jun 23;6(3):418–21.
- 750 56. McMahon TA, Greene PR. The influence of track compliance on running. Journal of Biomechanics.  
751 1979;12(12):893–904.
- 752 57. Ackermann M, van den Bogert AJ. Optimality principles for model-based prediction of human gait.  
753 Journal of Biomechanics. 2010 Apr;43(6):1055–60.
- 754 58. Martin AE, Schmiedeler JP. Predicting human walking gaits with a simple planar model. Journal of  
755 Biomechanics. 2014 Apr;47(6):1416–21.
- 756 59. Ma SP, Zahalak GI. A distribution-moment model of energetics in skeletal muscle. J Biomech.  
757 1991;24(1):21–35.
- 758 60. Zahalak GI, Motabarzadeh I. A re-examination of calcium activation in the Huxley cross-bridge  
759 model. J Biomech Eng. 1997 Feb;119(1):20–9.
- 760 61. Hogan MC, Ingham E, Kurdak SS. Contraction duration affects metabolic energy cost and fatigue in  
761 skeletal muscle. Am J Physiol. 1998 Mar;274(3 Pt 1):E397–402.
- 762 62. Haberland M, Karssen JGD, Kim S, Wisse M. The effect of swing leg retraction on running energy  
763 efficiency. In: 2011 IEEE/RSJ International Conference on Intelligent Robots and Systems. San  
764 Francisco, CA: IEEE; 2011. p. 3957–62.

- 765 63. Hasaneini SJ, Bertram JEA, Macnab CJB. Energy-optimal relative timing of stance-leg push-off and  
766 swing-leg retraction in walking. *Robotica*. 2017 Mar;35(3):654–86.

767

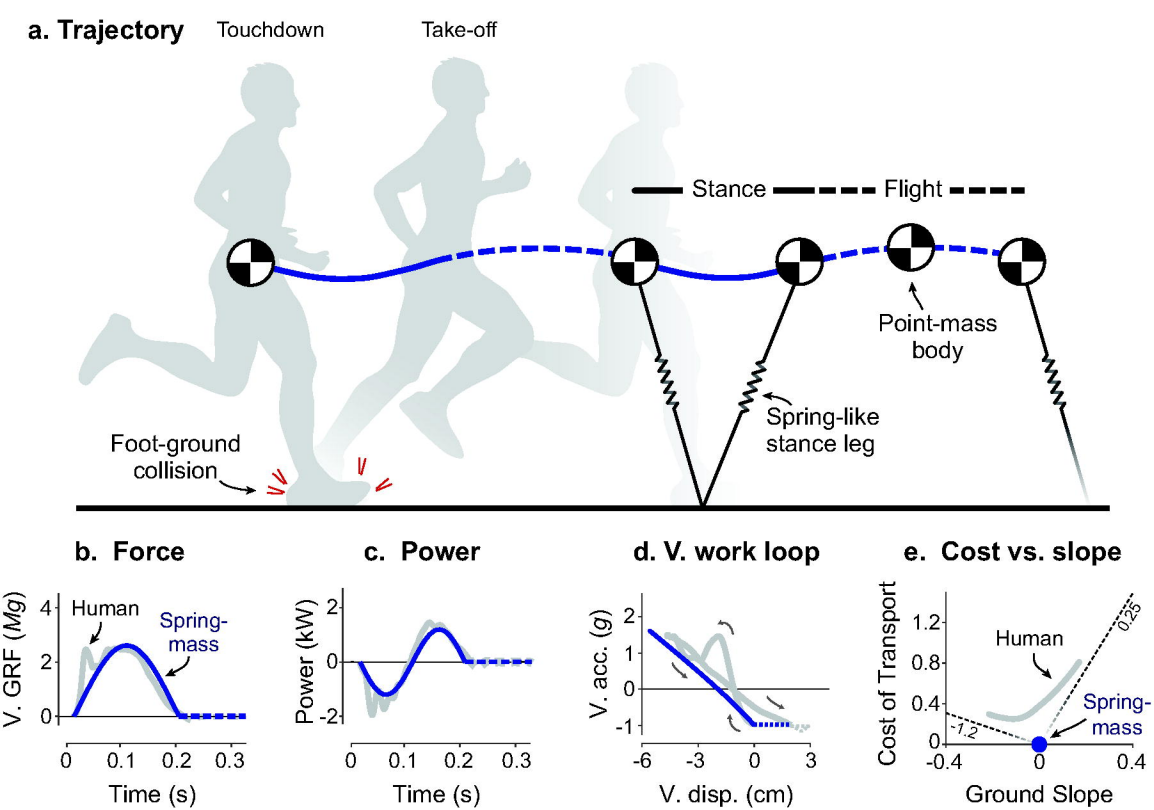

**a. Spring-mass**

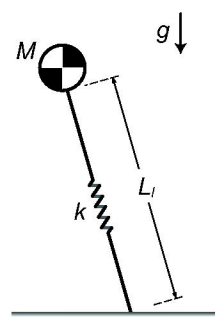

**b. Actuator-only**

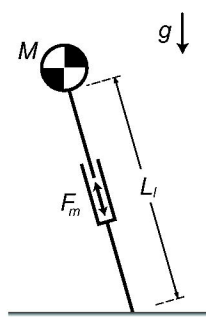

**c. Actuated Spring-mass**

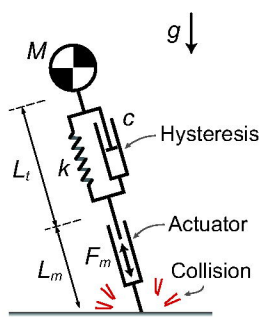

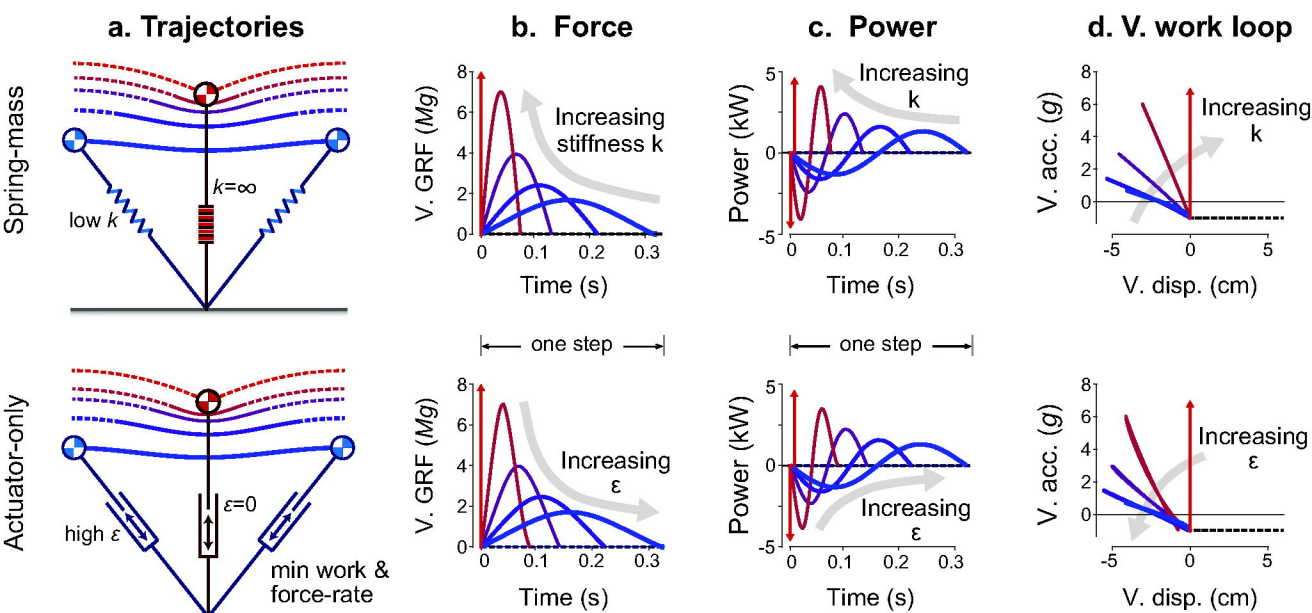



**a. Actuated Spring-mass**

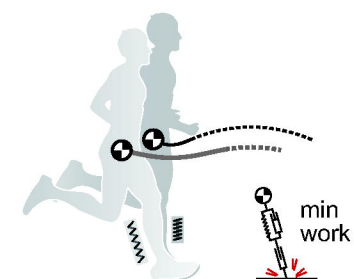

**b. Force**

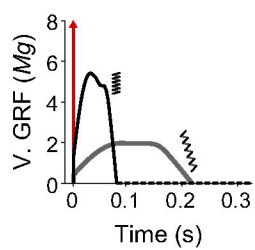

**c. Power**

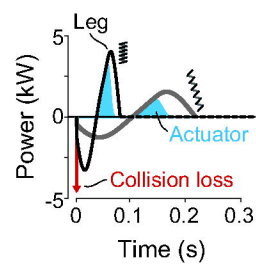

**d. V. work loop**

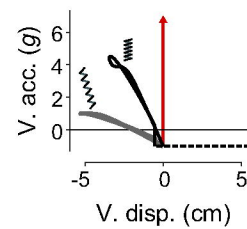

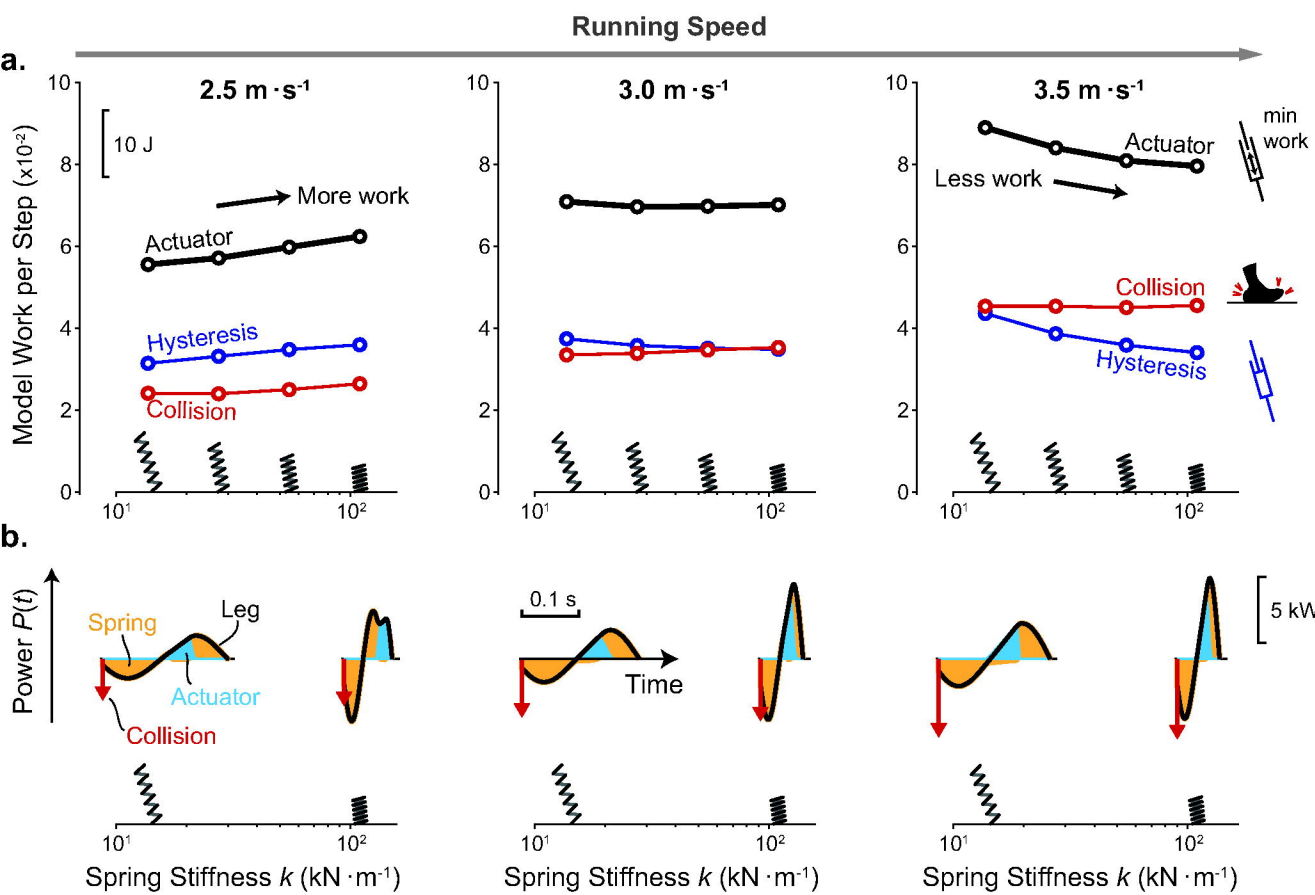

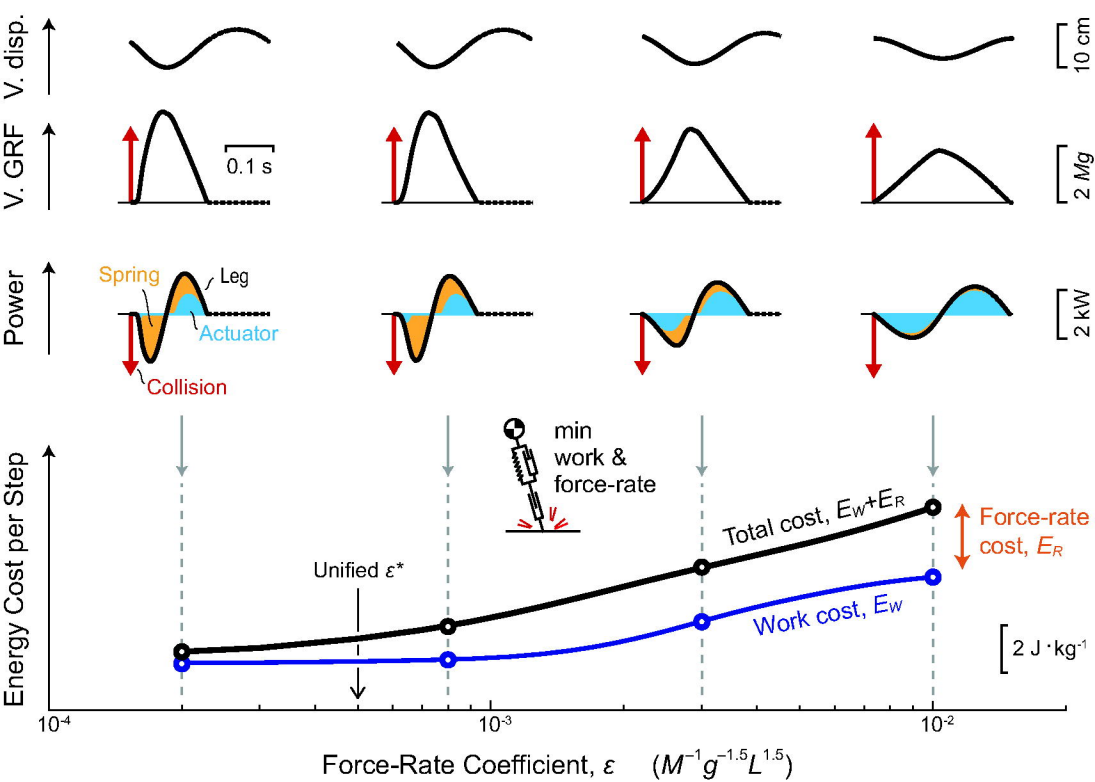

**a. Unified model**

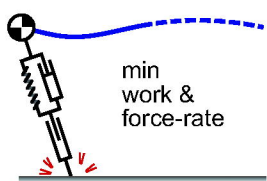

**b. Force**

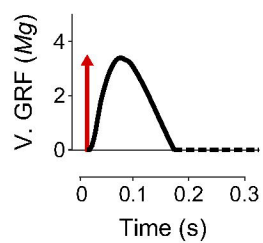

**c. Power**

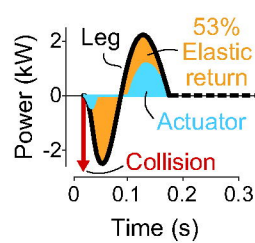

**d. V. work loop**

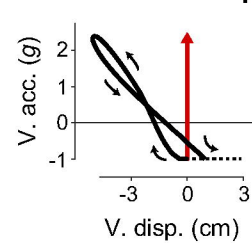

**Human**

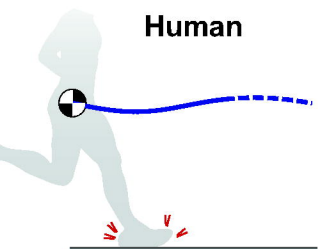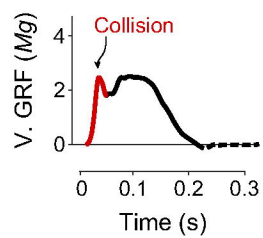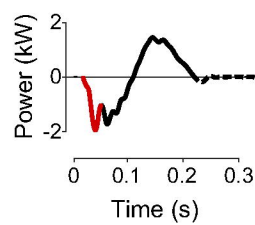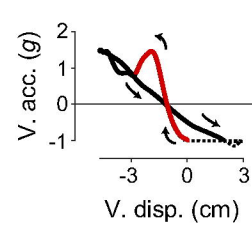

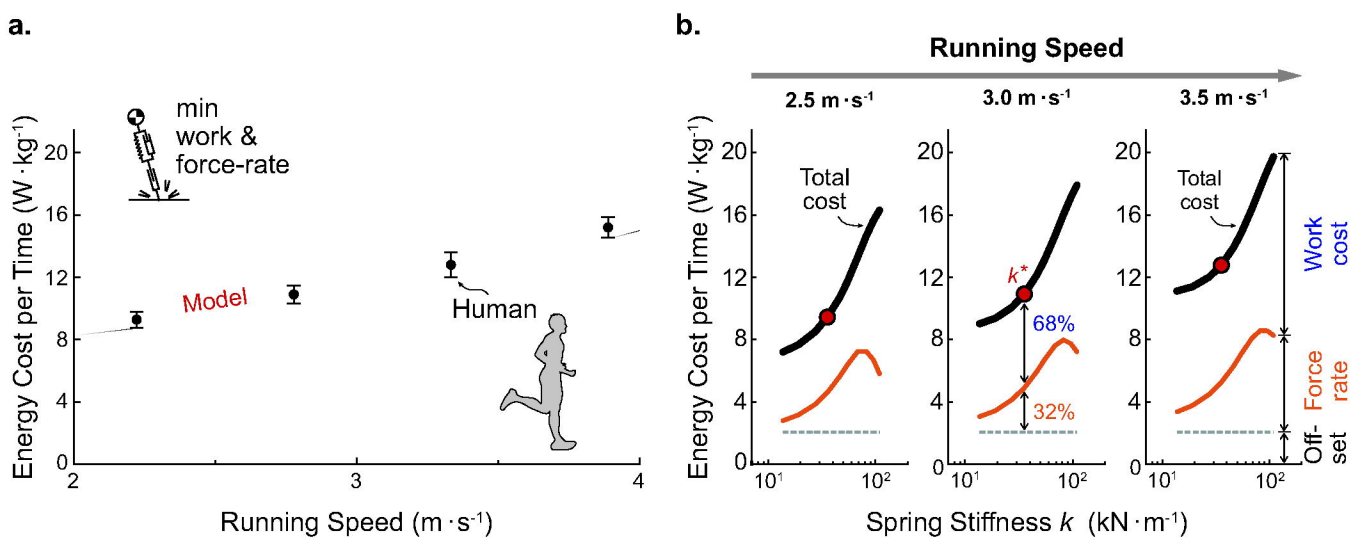

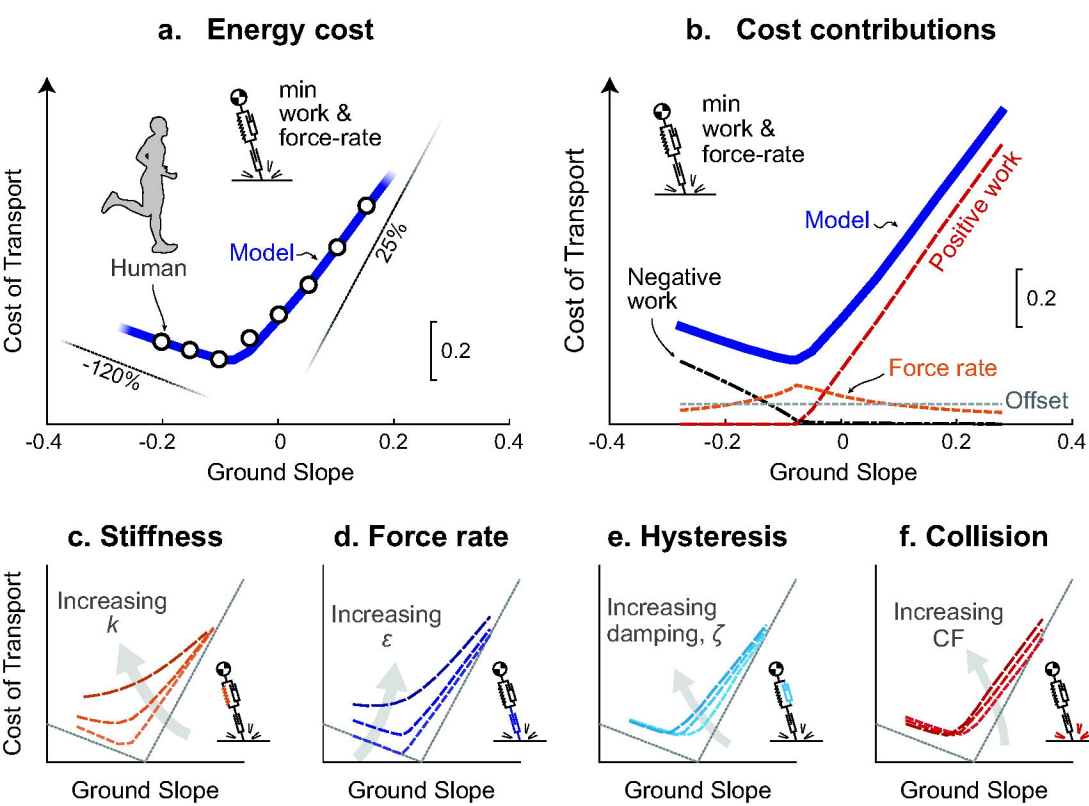

Source: http://biorxiv.org/content/10.1101/2021.05.08.443257v1.full.pdf
